# Supplementary material for: Selective modification of Ti6Al4V surfaces for biomedical applications
Source: Royal Society of Chemistry journal article supplement (doi:10.1039/c9ra11000c), 2020-01-01
Supplement: c9ra11000c1.pdf [file c9ra11000c1.pdf]

Supplementary Information

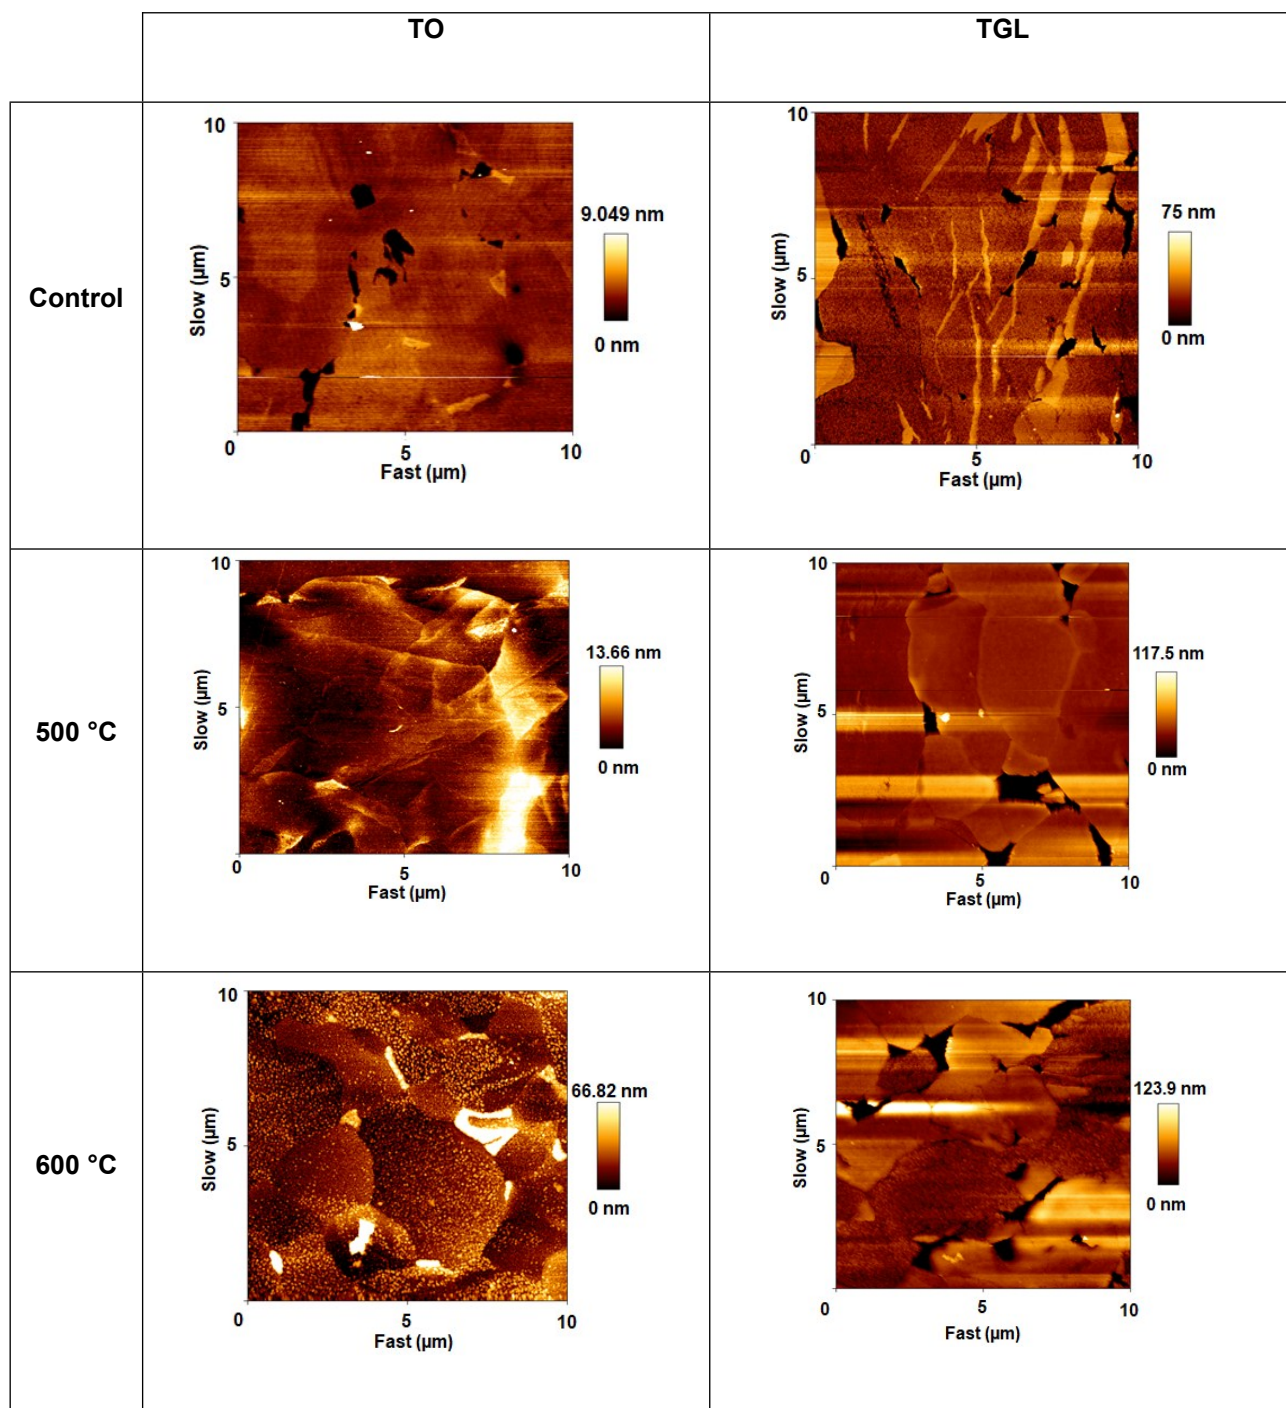

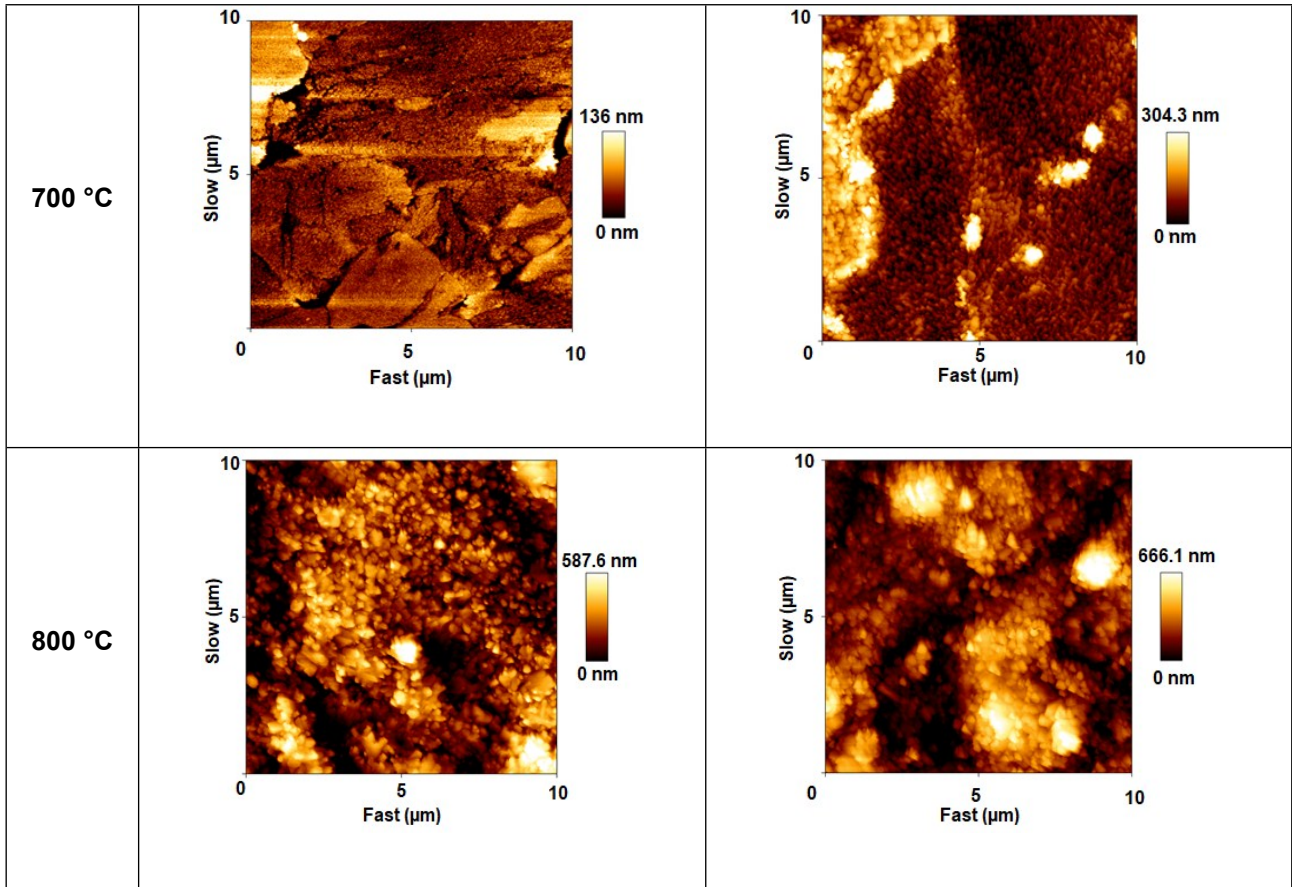

**Supplementary Figure 1.** AFM images 10 x 10  $\mu\text{m}$  area at a resolution of 512 x 512 pixels of mirror Ti6Al4V(MPT), thermally oxidised Ti6Al4V surfaces ( $\text{TO}_{500\text{ }^\circ\text{C}}$ ,  $\text{TO}_{600\text{ }^\circ\text{C}}$ ,  $\text{TO}_{700\text{ }^\circ\text{C}}$ ,  $\text{TO}_{800\text{ }^\circ\text{C}}$ ),  $\text{H}_2\text{O}_2/\text{HCl}$  chemically treated Ti6Al4V (TGL), and both chemically treated and thermally oxidised Ti6Al4V ( $\text{TGL-TO}_{500\text{ }^\circ\text{C}}$ ,  $\text{TGL-TO}_{600\text{ }^\circ\text{C}}$ ,  $\text{TGL-TO}_{700\text{ }^\circ\text{C}}$ ,  $\text{TGL-TO}_{800\text{ }^\circ\text{C}}$ ).

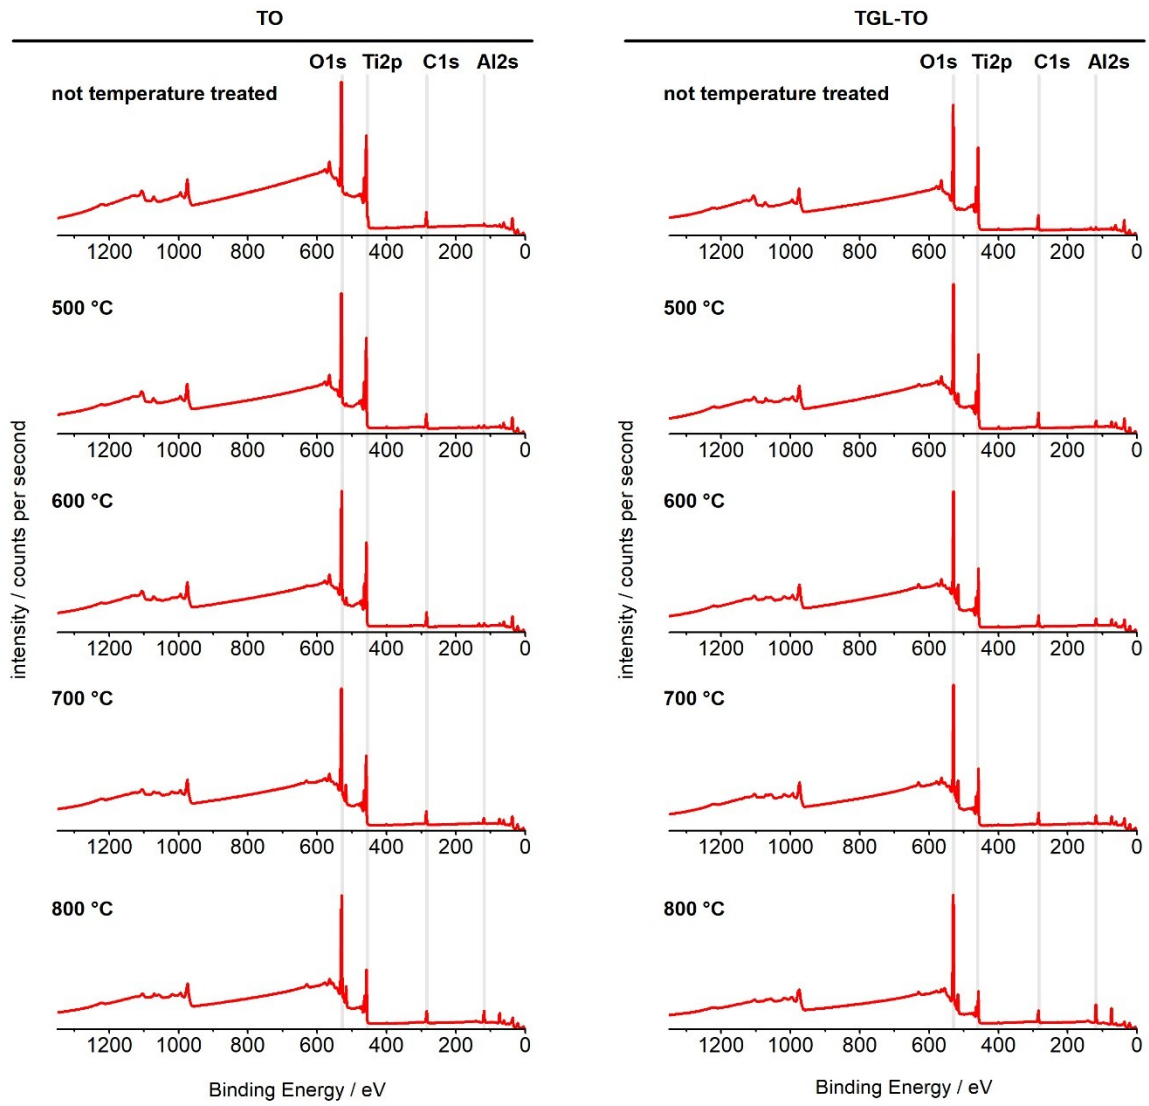

**Supplementary Figure 2:** XPS spectra of TO TGL-TO treated Ti6Al4V surfaces. Only the most prominent peaks are labelled for clarity.

**Supplementary Table 1.** Parameters used for the fitting of Ti2p high-resolution scans of treated Ti6Al4V surfaces obtained by XPS.

| Component     | Peak shape <sup>a</sup> | Area constraint     | Position<br>constraint<br>relative to Ti(IV)<br>2p3/2 / eV | FWHM<br>constraint |
|---------------|-------------------------|---------------------|------------------------------------------------------------|--------------------|
| Ti(0) 2p1/2   | LA(1.1,5,7)             | 0.5 x Ti(0) 2p3/2   | + 0.73                                                     | -                  |
| Ti(0) 2p3/2   | LA(1.1,5,7)             | -                   | - 5.37                                                     | 2 x Ti(IV) 2p3/2   |
| Ti(II) 2p1/2  | GL(50)                  | 0.5 x Ti(II) 2p3/2  | + 2.4                                                      | 1 x Ti(III) 2p1/2  |
| Ti(II) 2p3/2  | GL(50)                  | -                   | - 3.2                                                      | 1 x Ti(III) 2p3/2  |
| Ti(III) 2p1/2 | GL(50)                  | 0.5 x Ti(III) 2p3/2 | + 3.8                                                      | -                  |
| Ti(III) 2p3/2 | GL(50)                  | -                   | - 1.4                                                      | -                  |
| Ti(IV) 2p1/2  | GL(50)                  | 0.5 x Ti(IV) 2p3/2  | -                                                          | -                  |
| Ti(IV) 2p3/2  | A(0.3,0.1,0)GL(50)      | -                   | -                                                          | -                  |

<sup>a</sup> LA: asymmetric Lorentzian line shape; GL: Gaussian Lorentzian line shape; A()GL(): asymmetric

Gaussian Lorentzian line shape
